# Supplementary material for: Topographic organization of single-neuron projectome for mouse prefrontal cortex
Source: Research Square preprint supplement (doi:10.21203/rs.3.rs-117637/v1), 2020-12-18
Supplement: Supplementary file 1 [file e6a6fe5d43399404924d71cc.xlsx]

## Sheet: injection information
fMOST id	Injection regions (abbreviation)	Coordinates Angel (AP, ML, DV)	AAV
			AAV-Cre titer (V.G./ml)	AAV-EGFP titer (V.G./ml)	Mixture volume (nl/site)	Duration of expression (day)
17099*	MOs ORB ACA MOp PTLp VISp AUD	0°(2.5, ±1.5, -0.75) 0°(2.5, ±1.1, -2.5) 0°(1.7, ±0.5, -1.15) 0°(1.2, ±1.6, -0.5) 0°(1.8, ±1.5, -0.5) 0°(3.4, ±2.3, -0.6) 45°(2.4, ±6.4, -0.35)	1120000000	7460000000000	20	30	* For pilot studies, we injected viral tracer in multiple cortical regions of #17099 and #17100.
17100*	MOs ORB ACA MOp PTLp VISp AUD	0°(2.5, ±1.5, -0.75) 0°(2.5, ±1.1, -2.5) 0°(1.7, ±0.5, -1.15) 0°(1.2, ±1.6, -0.5) 0°(1.8, ±1.5, -0.5) 0°(3.4, ±2.3, -0.6) 45°(2.4, ±6.4, -0.35)	1120000000	7460000000000	20	30
17895	ORBvl	0°(2.58, -1.00, -2.4)	1120000000	7460000000000	20	30
17896	ORBvl	0°(2.58, -1.00, -2.4)	1120000000	7460000000000	20	30
17897	ORBvl	0°(2.58, -1.00, -2.4)	1120000000	7460000000000	20	30
17898	ORBvl	0°(2.58, -1.00, -2.4)	1120000000	7460000000000	20	30
17899	ORBvl	0°(2.58, 1.00, -2.4)	1120000000	7460000000000	20	30
192092	ACA	0°(1.80, -0.50, -1.10)	1490000000	6250000000000	50	61
192106	ORBm ORBl	0°(2.58, -0.25, -2.35) 0°(2.58, -1.63, -2.20)	1170000000	6250000000000	20 20	43
192108	ORBm ORBl	0°(2.58, -0.25, -2.35) 0°(2.58, -1.63, -2.20)	1170000000	6250000000000	20 20	43
192309	ORBm ORBl	0°(2.58, 0.25, -2.35) 0°(2.58, 1.63, -2.20)	1170000000	6250000000000	20 20	52
192310	ORBm ORBl	0°(2.58, 0.25, -2.35) 0°(2.58, 1.63, -2.20)	1170000000	6250000000000	20 20	52
192311	ORBm ORBl	0°(2.58, 0.25, -2.35) 0°(2.58, 1.63, -2.20)	1170000000	6250000000000	20 20	52
192981	ACAv ACAv ACAv	32°(0.06, 1.05, -1.92) 32°(0.40, 1.05, -2.10) 26°(0.80, 1.05, -2.22)	1190000000	6250000000000	20 20 20	62
192982	ACAv ACAv ACAv	32°(0.06, 1.05, -1.92) 32°(0.40, 1.05, -2.10) 26°(0.80, 1.05, -2.22)	1190000000	6250000000000	20 20 20	62
193869	ACAv ACAv ACAv	32°(0.06, 1.05, -1.92) 32°(0.40, 1.05, -2.10) 26°(0.80, 1.05, -2.22)	495000000	6250000000000	20 20 20	42
193871	ACAv ACAv ACAv	32°(0.06, 1.05, -1.92) 32°(0.40, 1.05, -2.10) 26°(0.80, 1.05, -2.22)	495000000	6250000000000	20 20 20	42
193872	ACAv ACAv ACAv	32°(0.06, 1.05, -1.92) 32°(0.40, 1.05, -2.10) 26°(0.80, 1.05, -2.22)	495000000	6250000000000	20 20 20	42
193873	ACAv ACAv ACAv	32°(0.06, 1.05, -1.92) 32°(0.40, 1.05, -2.10) 26°(0.80, 1.05, -2.22)	495000000	6250000000000	20 20 20	42
194525	ACA	0°(1.80, -0.50, -1.10)	495000000	6250000000000	20	51
194526	ACA	0°(1.80, -0.50, -1.10)	495000000	6250000000000	20	51
194527	ACA	0°(1.80, -0.50, -1.10)	495000000	6250000000000	20	51
194528	ACA	0°(1.80, -0.50, -1.10)	495000000	6250000000000	20	51
194530	ACA	0°(1.94, -0.50, -1.10)	495000000	6250000000000	20	51
194531	ACA	0°(1.94, -0.50, -1.10)	495000000	6250000000000	20	51
194778	ORBm AI	0°(2.58, 0.25, -2.35) 0°(2.58, 2.00, -2.35)	396000000	6250000000000	20 20	60
194779	ORBm AI	0°(2.58, 0.25, -2.35) 0°(2.58, 2.00, -2.35)	396000000	6250000000000	20 20	60
194780	ORBm AI	0°(2.58, 0.25, -2.35) 0°(2.58, 2.00, -2.35)	396000000	6250000000000	20 20	60
194781	ORBvl AI	0°(2.58, 1.00, -2.35) 0°(2.58, 2.00, -2.35)	396000000	6250000000000	20 20	61
194782	ORBvl AI	0°(2.58, 1.00, -2.35) 0°(2.58, 2.00, -2.35)	396000000	6250000000000	20 20	61
194783	ORBvl AI	0°(2.58, 1.00, -2.35) 0°(2.58, 2.00, -2.35)	396000000	6250000000000	20 20	61
194784	ORBvl AI	0°(2.58, 1.00, -2.35) 0°(2.58, 2.00, -2.35)	396000000	6250000000000	20 20	62
194785	ORBvl AI	0°(2.58, 1.00, -2.35) 0°(2.58, 2.00, -2.35)	396000000	6250000000000	20 20	62
194786	ORBvl AI	0°(2.58, 1.00, -2.35) 0°(2.58, 2.00, -2.35)	396000000	6250000000000	20 20	62
194808	ORBl	0°(2.22, 1.35, -2.20)	396000000	6250000000000	20	42
194809	ORBl	0°(2.22, 1.35, -2.20)	396000000	6250000000000	20	42
194810	ORBl	0°(2.22, 1.35, -2.20)	396000000	6250000000000	20	42
195041	AI AI	0°(2.00, -2.52, -3.00) 0°(1.50, -2.97, -3.20)	495000000	6250000000000	30 30	45
195042	AI AI	0°(2.00, -2.52, -3.00) 0°(1.50, -2.97, -3.20)	495000000	6250000000000	30 30	45
195043	AI AI	0°(2.00, -2.52, -3.00) 0°(1.50, -2.97, -3.20)	495000000	6250000000000	30 30	45
195044	AI AI	0°(2.00, -2.52, -3.00) 0°(1.50, -2.97, -3.20)	495000000	6250000000000	30 30	45
195045	AI AI	0°(2.00, -2.52, -3.00) 0°(1.50, -2.97, -3.20)	495000000	6250000000000	30 30	45
195046	AI AI	0°(2.00, -2.52, -3.00) 0°(1.50, -2.97, -3.20)	495000000	6250000000000	30 30	45
195047	ACAd ACAd	30°(0.80, -0.80, -1.65) 0°(1.84, -0.50, -1.60)	495000000	6250000000000	30 30	50
195049	ACAd ACAd	30°(0.80, -0.80, -1.65) 0°(1.84, -0.50, -1.60)	495000000	6250000000000	30 30	50
195051	ACAd ACAd	30°(0.80, 0.80, -1.65) 0°(1.84, 0.50, -1.60)	495000000	6250000000000	30 30	50
195199	ACAv ACAv ACAv	32°(0.06, -1.05, -1.92) 32°(0.40, -1.05, -2.10) 26°(0.80, -1.05, -2.22)	495000000	6250000000000	20 20 20	50
195613	ACA	0°(1.80, -0.50, -1.10)	495000000	6250000000000	20	54
195614	ACA	0°(1.80, -0.50, -1.10)	495000000	6250000000000	20	54
195616	ACA	0°(1.80, -0.50, -1.10)	495000000	6250000000000	20	54
195618	ACA	0°(1.94, -0.50, -1.10)	495000000	6250000000000	20	54
195619	ACA	0°(1.94, -0.50, -1.10)	495000000	6250000000000	20	54
195620	ACA	0°(1.94, -0.50, -1.10)	495000000	6250000000000	20	54
195780	ORBl	0°(2.22, 1.00, -2.65)	330000000	6250000000000	20	45
195781	ORBl	0°(2.22, 1.00, -2.65)	330000000	6250000000000	20	45
195782	ORBl	0°(2.22, 1.00, -2.65)	330000000	6250000000000	20	45
195783	ORBl	0°(2.22, 1.00, -2.65)	330000000	6250000000000	20	45
195784	ORBl	0°(2.22, 1.00, -2.65)	330000000	6250000000000	20	45
195786	ORBl	0°(2.22, 1.00, -2.65)	330000000	6250000000000	20	45
195787	ORBm	0°(2.58, 0.25, -2.00)	330000000	6250000000000	20	45
195788	ORBm	0°(2.58, 0.25, -2.00)	330000000	6250000000000	20	45
195789	ORBm	0°(2.58, 0.25, -2.00)	330000000	6250000000000	20	45
195791	ORBm	0°(2.58, 0.25, -2.00)	330000000	6250000000000	20	45
195817	ORBm	0°(2.58, 0.25, -2.00)	330000000	6250000000000	20	45
195818	ORBl	0°(2.58, 1.63, -2.20)	330000000	6250000000000	20	45
195819	ORBl	0°(2.58, 1.63, -2.20)	330000000	6250000000000	20	45
195820	ORBl	0°(2.58, 1.63, -2.20)	330000000	6250000000000	20	45
195821	ORBl	0°(2.58, 1.63, -2.20)	330000000	6250000000000	20	45
195822	ORBl	0°(2.58, 1.63, -2.20)	330000000	6250000000000	20	45
195826	ORBl	0°(2.58, 1.63, -2.20)	330000000	6250000000000	20	45
195827	ACAv ACAv	32°(0.06, 1.05, -1.92) 32°(0.40, 1.05, -2.10)	495000000	6250000000000	30 30	45
195828	ACAv ACAv	32°(0.06, 1.05, -1.92) 32°(0.40, 1.05, -2.10)	495000000	6250000000000	30 30	45
195829	ACAv ACAv	32°(0.06, 1.05, -1.92) 26°(0.80, 1.05, -2.22)	495000000	6250000000000	30 30	45
195830	ACAv ACAv	32°(0.06, 1.05, -1.92) 26°(0.80, 1.05, -2.22)	495000000	6250000000000	30 30	45
195831	ACAv ACAv	32°(0.40, 1.05, -2.10) 26°(0.80, 1.05, -2.22)	495000000	6250000000000	30 30	45
195832	ACAv ACAv	32°(0.40, 1.05, -2.10) 26°(0.80, 1.05, -2.22)	495000000	6250000000000	30 30	45
195833	AI AI	0°(2.00, 2.52, -3.00) 0°(1.50, 2.97, -3.20)	495000000	6250000000000	30 30	45
195834	AI AI	0°(2.00, 2.52, -3.00) 0°(1.50, 2.97, -3.20)	495000000	6250000000000	30 30	45
195838	ACAv AI	26°(0.80, 1.05, -2.22) 0°(1.50, 2.97, -3.20)	495000000	6250000000000	30 30	45
195839	ACAv AI	26°(0.80, 1.05, -2.22) 0°(1.50, 2.97, -3.20)	495000000	6250000000000	30 30	45
195840	ACAv AI	26°(0.80, 1.05, -2.22) 0°(1.50, 2.97, -3.20)	495000000	6250000000000	30 30	45
195841	ACAv AI	26°(0.80, 1.05, -2.22) 0°(1.50, 2.97, -3.20)	495000000	6250000000000	30 30	45
195936	PL IL	26°(1.98, -1.20, -1.80) 0°(1.54, -0.30, -3.04)	330000000	6250000000000	30 30	46
195937	PL IL	26°(1.98, -1.20, -1.80) 0°(1.54, -0.30, -3.04)	330000000	6250000000000	30 30	46
195938	PL IL	26°(1.98, -1.20, -1.80) 0°(1.54, -0.30, -3.04)	330000000	6250000000000	30 30	46
195939	PL IL	26°(1.98, -1.20, -1.80) 0°(1.54, -0.30, -3.04)	330000000	6250000000000	30 30	46
195941	PL IL	26°(1.98, -1.20, -1.80) 0°(1.54, -0.30, -3.04)	330000000	6250000000000	30 30	46
195942	PL IL	26°(1.98, -1.20, -1.80) 0°(1.54, -0.30, -3.04)	330000000	6250000000000	30 30	46
195943	PL IL	26°(1.98, -1.20, -1.80) 0°(1.54, -0.30, -3.04)	330000000	6250000000000	30 30	46
195944	PL IL	26°(1.98, -1.20, -1.80) 0°(1.54, -0.30, -3.04)	330000000	6250000000000	30 30	46
195945	PL IL	26°(2.34, -0.30, -1.25) 0°(1.54, -0.30, -3.04)	330000000	6250000000000	30 30	46
196548	PL PL ORBvl	0°(1.98, 0.30, -2.25) 0°(2.58, 0.40, -1.60) 0°(2.68, 1.00, -2.50)	396000000	6250000000000	10 20 20	60
196549	PL PL ORBvl	0°(1.98, 0.30, -2.25) 0°(2.58, 0.40, -1.60) 0°(2.68, 1.00, -2.50)	396000000	6250000000000	10 20 20	60
196550	PL PL ORBvl	0°(1.98, 0.30, -2.25) 0°(2.58, 0.40, -1.60) 0°(2.68, 1.00, -2.50)	396000000	6250000000000	10 20 20	60
200194	ACAd ACAd ACAd	30°(0.06, -0.71, -1.33) 30°(0.40, -0.75, -1.50) 30°(0.80, -0.80, -1.65)	495000000	6250000000000	20 20 20	50
200195	ACAd ACAd ACAd	30°(0.06, -0.71, -1.33) 30°(0.40, -0.75, -1.50) 30°(0.80, -0.80, -1.65)	495000000	6250000000000	20 20 20	50
200196	ACAd ACAd ACAd	30°(0.06, -0.71, -1.33) 30°(0.40, -0.75, -1.50) 30°(0.80, -0.80, -1.65)	495000000	6250000000000	20 20 20	50
200197	ACAd ACAd ACAd	30°(0.06, -0.71, -1.33) 30°(0.40, -0.75, -1.50) 30°(0.80, -0.80, -1.65)	495000000	6250000000000	20 20 20	50
200198	ACAd ACAd ACAd	30°(0.06, -0.71, -1.33) 30°(0.40, -0.75, -1.50) 30°(0.80, -0.80, -1.65)	495000000	6250000000000	20 20 20	50
200199	ACAd ACAd ACAd	30°(0.06, -0.71, -1.33) 30°(0.40, -0.75, -1.50) 30°(0.80, -0.80, -1.65)	495000000	6250000000000	20 20 20	50
200290	ORBm ORBvl	0°(2.10, 0.50, -3.00) 0°(2.58, -1.00, -2.50)	330000000	6250000000000	20 20	55
200293	ORBm ORBvl	0°(2.10, 0.50, -3.00) 0°(2.58, -1.00, -2.50)	330000000	6250000000000	20 20	55
200294	ORBm ORBvl	0°(2.10, 0.50, -3.00) 0°(2.58, -1.00, -2.50)	330000000	6250000000000	20 20	56
200295	ORBm ORBvl	0°(2.10, 0.50, -3.00) 0°(2.58, -1.00, -2.50)	330000000	6250000000000	20 20	56
200296	ORBm ORBvl	0°(2.10, 0.50, -3.00) 0°(2.58, -1.00, -2.50)	330000000	6250000000000	20 20	56
200297	ORBm ORBvl	0°(2.10, 0.50, -3.00) 0°(2.58, -1.00, -2.50)	330000000	6250000000000	20 20	56
200299	ORBm ORBvl	0°(2.10, 0.50, -3.00) 0°(2.58, -1.00, -2.50)	330000000	6250000000000	20 20	57
200306	AI	0°(1.18, 2.75, -3.56)	495000000	6250000000000	20	45
200307	AI	0°(1.18, 2.75, -3.56)	495000000	6250000000000	20	45
200308	AI	0°(1.60, 2.97, -3.20)	495000000	6250000000000	20	45
200309	AI	0°(1.60, 2.97, -3.20)	495000000	6250000000000	20	45
200310	AI	0°(2.10, 2.52, -3.00)	495000000	6250000000000	20	45
200311	AI	0°(2.10, 2.52, -3.00)	495000000	6250000000000	20	45
200312	AI	0°(2.10, 2.52, -3.00)	495000000	6250000000000	20	45
200313	AI AI	0°(1.18, 2.75, -3.56) 0°(2.10, 2.52, -3.00)	495000000	6250000000000	25 25	45
200314	AI AI	0°(1.18, 2.75, -3.56) 0°(2.10, 2.52, -3.00)	495000000	6250000000000	25 25	46
200315	AI AI	0°(1.18, 2.75, -3.56) 0°(2.10, 2.52, -3.00)	495000000	6250000000000	25 25	46
200320	ACA	0°(1.80, -0.50, -1.10)	495000000	6250000000000	20	50
200321	ACA	0°(1.80, -0.50, -1.10)	495000000	6250000000000	20	50
200323	ACA	0°(1.94, -0.50, -1.10)	495000000	6250000000000	20	50
200325	ACA	0°(1.94, -0.50, -1.10)	495000000	6250000000000	20	50
200327	PL IL	26°(2.34, -0.30, -1.25) 0°(1.54, -0.30, -3.04)	330000000	6250000000000	30 30	52
200329	PL IL	26°(2.34, -0.30, -1.25) 0°(1.54, -0.30, -3.04)	330000000	6250000000000	30 30	52
200331	PL IL	26°(2.34, -0.30, -1.25) 0°(1.54, -0.30, -3.04)	330000000	6250000000000	30 30	52
200333	PL IL	26°(2.34, -0.30, -1.25) 0°(1.54, -0.30, -3.04)	330000000	6250000000000	30 30	52
200579	PL IL	0°(1.93, -0.64, -2.40) 0°(1.54, -0.30, -3.04)	330000000	6250000000000	30 30	99
200582	PL IL	0°(1.93, -0.64, -2.40) 0°(1.54, -0.30, -3.04)	330000000	6250000000000	30 30	99
200583	PL IL	0°(1.93, -0.64, -2.40) 0°(1.54, -0.30, -3.04)	330000000	6250000000000	30 30	99
201388	ACA	0°(1.54, 0.50, -2.00)	495000000	6250000000000	20	41
201389	ACA	0°(1.54, 0.50, -2.00)	495000000	6250000000000	20	41
201390	ACA	0°(1.54, 0.50, -2.00)	495000000	6250000000000	20	41
201391	ACA	0°(1.10, 0.50, -2.00)	495000000	6250000000000	20	41
201393	ACA	0°(1.10, 0.50, -2.00)	495000000	6250000000000	20	41
201397	AI	0°(2.10, 1.25, -2.70)	495000000	6250000000000	20	41
201398	AI	0°(2.10, 1.25, -2.70)	495000000	6250000000000	20	41
201399	AI	0°(2.10, 1.25, -2.70)	495000000	6250000000000	20	41
201400	AI	0°(2.10, 1.25, -2.70)	495000000	6250000000000	20	41
201401	AI	0°(2.10, 1.25, -2.70)	495000000	6250000000000	20	41
201568	ORBm/PL ORBm/PL	0°(2.80, 0.44, -2.00) 0°(2.80, -0.44, -2.00)	330000000	6250000000000	20 20	45
201569	ORBm/PL ORBm/PL	0°(2.80, 0.44, -2.00) 0°(2.80, -0.44, -2.00)	330000000	6250000000000	20 20	45
201570	ORBm/PL ORBm/PL	0°(2.80, 0.44, -2.00) 0°(2.80, -0.44, -2.00)	330000000	6250000000000	20 20	45
201571	ORBm/PL ORBm/PL	0°(2.80, 0.44, -2.00) 0°(2.80, -0.44, -2.00)	330000000	6250000000000	20 20	45
201572	ORBm/PL ORBm/PL	0°(2.80, 0.44, -2.00) 0°(2.80, -0.44, -2.00)	330000000	6250000000000	20 20	45
201573	ORBm/PL ORBm/PL	0°(2.80, 0.44, -2.00) 0°(2.80, -0.44, -2.00)	330000000	6250000000000	20 20	45
201575	ORBm/PL ORBm/PL	0°(2.80, 0.44, -2.00) 0°(2.80, -0.44, -2.00)	330000000	6250000000000	20 20	46
201577	ORBm/PL ORBm/PL	0°(2.80, 0.44, -2.00) 0°(2.80, -0.44, -2.00)	330000000	6250000000000	20 20	46
201730	PL	0°(1.93, -0.64, -2.40)	330000000	6250000000000	30	44
201731	PL	0°(1.93, -0.64, -2.40)	330000000	6250000000000	30	44
201732	PL	0°(1.93, -0.64, -2.40)	330000000	6250000000000	30	44

## Sheet: Sheet1
192092	14
192106	140
192108	170
192309	29
192310	106
192311	56
192981	64
192982	58
193869	13
193871	11
193872	10
193873	7
194525	22
194526	14
194527	11
194528	15
194530	10
194531	8
194778	162
194779	104
194780	71
194781	70
194782	97
194783	74
194784	73
194785	21
194786	89
194808	14
194809	15
194810	51
195041	66
195042	67
195043	43
195044	22
195045	58
195046	48
195047	26
195049	20
195051	32
195199	105
195613	25
195614	34
195615	24
195616	40
195617	20
195618	32
195619	17
195620	50
195780	12
195781	22
195782	16
195783	16
195784	18
195786	23
195787	32
195788	115
195789	43
195791	42
195817	118
195818	25
195819	30
195820	52
195821	34
195822	50
195826	93
195827	30
195828	50
195829	34
195830	27
195831	30
195832	46
195833	59
195834	39
195838	86
195839	162
195840	134
195841	78
195936	42
195937	32
195938	37
195939	22
195941	18
195942	65
195943	58
195944	28
195945	7
196548	50
196549	32
196550	77
200194	103
200195	22
200196	74
200197	73
200198	49
200199	64
200209	41
200290	46
200293	96
200294	44
200295	97
200296	53
200297	121
200299	53
200306	30
200307	25
200308	52
200309	26
200310	37
200311	28
200312	22
200313	83
200314	48
200315	36
200320	33
200321	37
200323	25
200324	22
200325	20
200327	59
200328	3
200329	52
200331	27
200333	43
200579	40
200582	65
200583	69
201388	58
201389	27
201390	25
201391	14
201393	28
201397	7
201398	30
201399	33
201400	31
201401	27
201568	55
201569	22
201570	48
201571	54
201572	29
201573	42
201574	54
201575	55
201577	45
201730	21
201731	52
201732	40
201758	27
201759	33
201760	35
201761	43
201762	40
201763	51
201764	38
