# Supplementary material for: Topographic organization of single-neuron projectome for mouse prefrontal cortex
Source: Research Square preprint supplement (doi:10.21203/rs.3.rs-117637/v1), 2020-12-18

# Extended Data Figure 3

## a Laminar distribution of IT neurons projecting to five additional targets

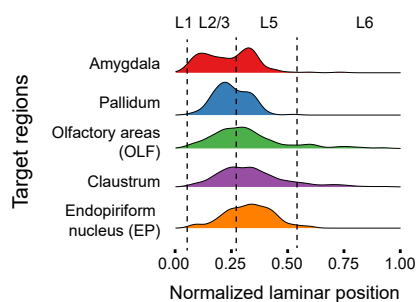

## b Example IT neurons projecting to five additional targets

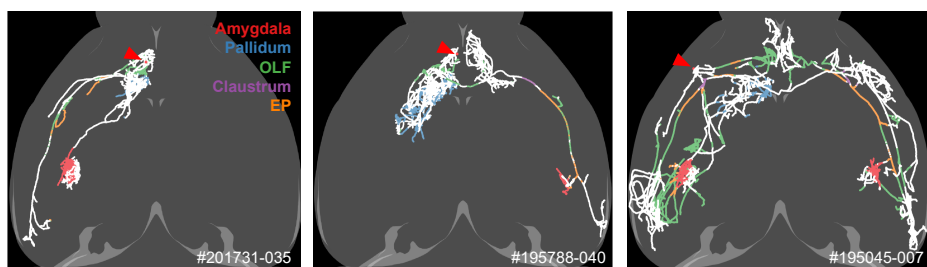

## c Soma distribution

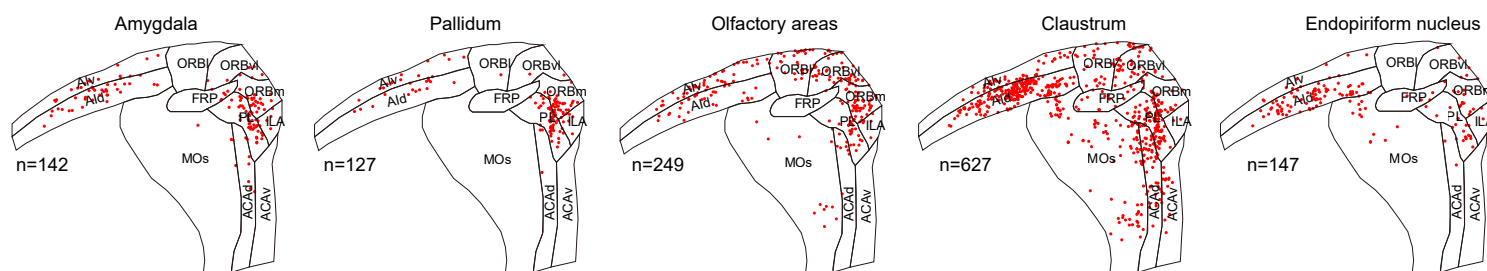

## d Projection map of IT neurons with contralateral projection (n=2,605)

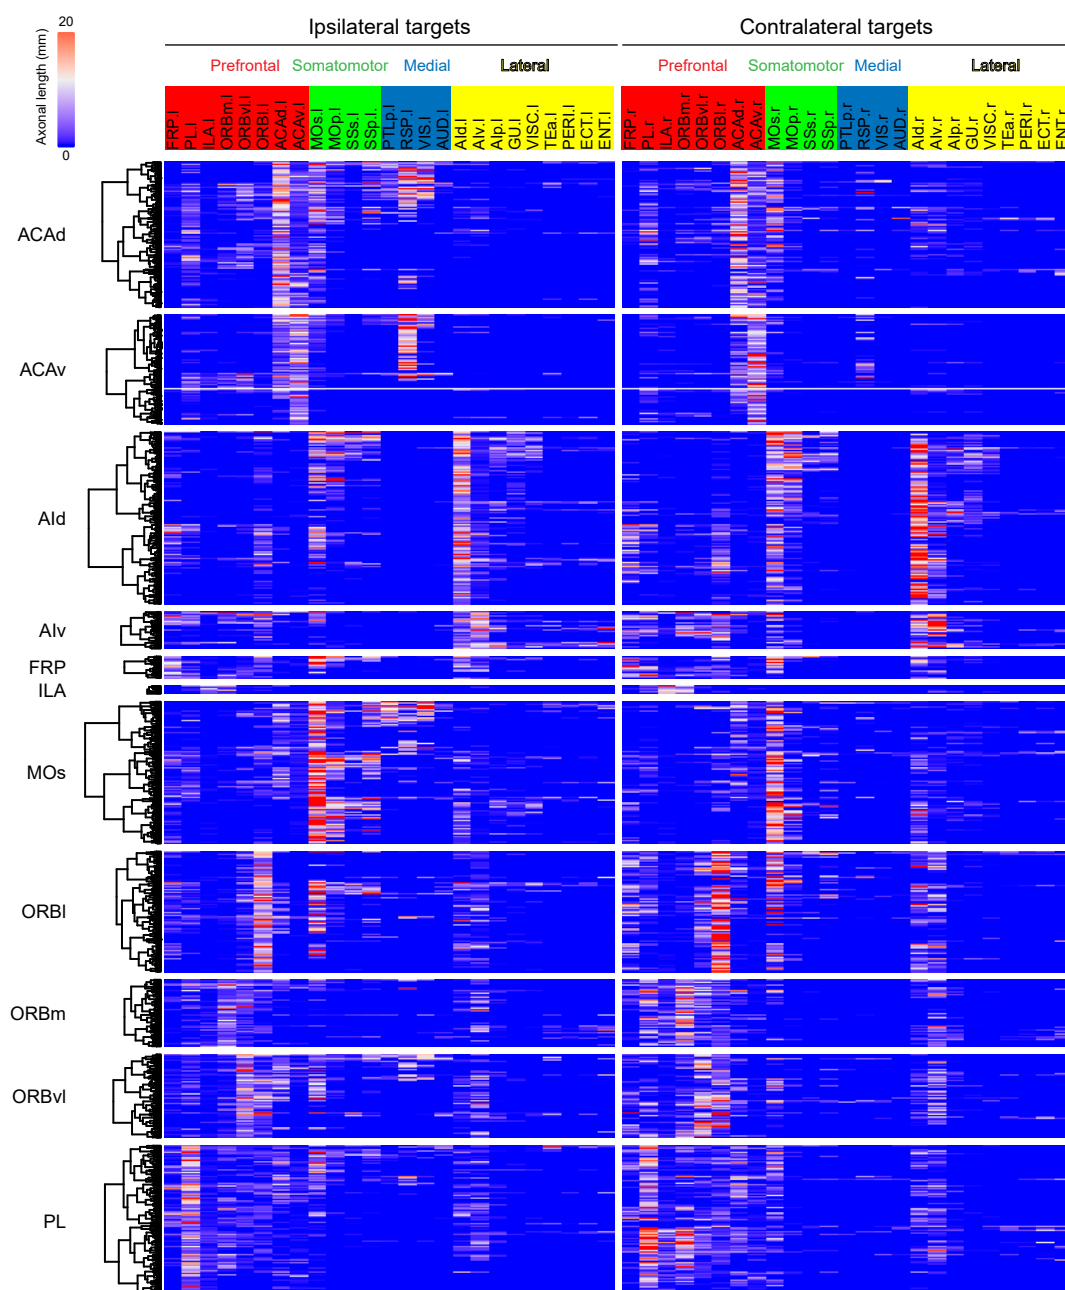

## e Symmetry of ipsi- and contralateral projection

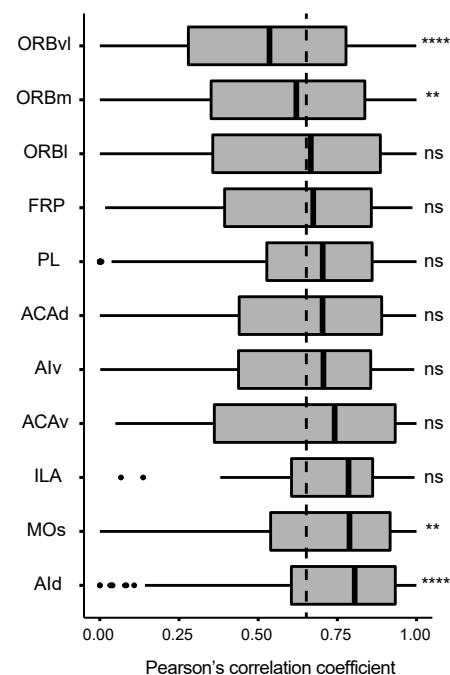

Supplement: Supplementary file 4 [file 50c591ac686fc5d783a1ddb1.pdf]
