# Supplementary material for: Topographic organization of single-neuron projectome for mouse prefrontal cortex
Source: Research Square preprint supplement (doi:10.21203/rs.3.rs-117637/v1), 2020-12-18
Supplement: Supplementary file 5 [file 58f2548e8f5fd1c6e8f70c17.pdf]

## Supplementary Information

Table. Summary of neuronal subclass and related function

| Class              | Area                    | Subclass (main targets)      | Related Function                                                                                                                                      |
|--------------------|-------------------------|------------------------------|-------------------------------------------------------------------------------------------------------------------------------------------------------|
| IT neuron          | MOs (medial)            | IT-5 (AUD)                   | Corollary discharge in the auditory cortex <sup>1</sup>                                                                                               |
|                    | ACA                     | IT-5 (VIS)                   | Top-down modulation on visual processing <sup>2</sup>                                                                                                 |
|                    |                         | IT-6 (RSP)                   |                                                                                                                                                       |
|                    | ORBm                    | IT-1 (ENT)                   |                                                                                                                                                       |
|                    | ORBvl                   | IT-5 (AUD)                   | Associative learning <sup>3</sup>                                                                                                                     |
|                    | ORB1                    | IT-3 (SS)                    | Flexible behavior <sup>4</sup>                                                                                                                        |
|                    | Ald                     | IT-2 (Alp)                   |                                                                                                                                                       |
|                    |                         | IT-4 (MOp)                   |                                                                                                                                                       |
| AIV                | IT-1 (ENT)              |                              |                                                                                                                                                       |
|                    | IT-2 (Alp)              |                              |                                                                                                                                                       |
| PT neuron          | MOs                     | PT-2 (MY)                    | Motor execution <sup>5</sup>                                                                                                                          |
|                    |                         | PT-1 (TH)                    | Motor planning <sup>5</sup>                                                                                                                           |
|                    | ACAd                    | PT-5 (SCm)                   | Top-down modulation on visual processing <sup>6</sup>                                                                                                 |
|                    |                         | PT-6 (Pons)                  |                                                                                                                                                       |
|                    | ACAv                    | PT-4 (SCm)                   | Top-down modulation on visual processing <sup>6</sup>                                                                                                 |
|                    |                         | PT-8 (HY)                    |                                                                                                                                                       |
|                    | ORB1                    | PT-1 (SCm)                   |                                                                                                                                                       |
|                    | Ald                     | PT-2 (MY)                    |                                                                                                                                                       |
| PT-11, 12 (TH, HY) |                         | Feeding control <sup>7</sup> |                                                                                                                                                       |
| CT neuron          | MOs (anterior, lateral) | CT-3 (MD, VM)                | Motor preparation and persistent activity <sup>8</sup>                                                                                                |
|                    | MOs (posterior, medial) | CT-1 (CL, LD)                |                                                                                                                                                       |
|                    | ACAd                    | CT-1, 2 (CL, LD, AD)         |                                                                                                                                                       |
|                    | ACAv                    | CT-2 (CL, AD)                |                                                                                                                                                       |
|                    | PL/IL/ORBm (mPFC)       | CT-6 (MD, RE, PT)            | Sustaining prefrontal activity during working memory maintenance <sup>9</sup> ;<br>thalamic control of functional cortical connectivity <sup>10</sup> |
|                    | ORBvl                   | CT-4, 6 (MD, RE)             |                                                                                                                                                       |
|                    | ORB1                    | CT-3, 4, 5 (MD, SMT)         |                                                                                                                                                       |
|                    | Ald                     | CT-3, 4 (MD, VM)             |                                                                                                                                                       |

## Reference

1. Schneider, D.M., Nelson, A. & Mooney, R. A synaptic and circuit basis for corollary discharge in the auditory cortex. *Nature* **513**, 189-194 (2014).
2. Zhang, S. *et al.* Selective attention. Long-range and local circuits for top-down modulation of visual cortex processing. *Science* **345**, 660-665 (2014).
3. Liu, D. *et al.* Orbitofrontal control of visual cortex gain promotes visual associative learning. *Nat Commun* **11**, 2784 (2020).
4. Banerjee, A. *et al.* Value-guided remapping of sensory cortex by lateral orbitofrontal cortex.

- Nature* **585**, 245-250 (2020).
5. Economo, M.N. *et al.* Distinct descending motor cortex pathways and their roles in movement. *Nature* **563**, 79-84 (2018).
  6. Hu, F. *et al.* Prefrontal Corticotectal Neurons Enhance Visual Processing through the Superior Colliculus and Pulvinar Thalamus. *Neuron* **104**, 1141-1152 e1144 (2019).
  7. Wu, Y. *et al.* The anterior insular cortex unilaterally controls feeding in response to aversive visceral stimuli in mice. *Nat Commun* **11**, 640 (2020).
  8. Guo, Z.V. *et al.* Maintenance of persistent activity in a frontal thalamocortical loop. *Nature* **545**, 181-186 (2017).
  9. Bolkan, S.S. *et al.* Thalamic projections sustain prefrontal activity during working memory maintenance. *Nat Neurosci* **20**, 987-996 (2017).
  10. Schmitt, L.I. *et al.* Thalamic amplification of cortical connectivity sustains attentional control. *Nature* **545**, 219-223 (2017).
