# Supplementary material for: Topographic organization of single-neuron projectome for mouse prefrontal cortex
Source: Research Square preprint supplement (doi:10.21203/rs.3.rs-117637/v1), 2020-12-18
Supplement: Supplementary file 7 [file 8da7616756843f167a33ed1f.pdf]

## Supplementary Information

Table: Abbreviations of brain structures

| Structure             | Abbreviation               | Full structure name                       |
|-----------------------|----------------------------|-------------------------------------------|
| Isocortex             | FRP                        | Frontal pole, cerebral cortex             |
|                       | MOs                        | Secondary motor area                      |
|                       | ACAd                       | Anterior cingulate area, dorsal part      |
|                       | ACAv                       | Anterior cingulate area, ventral part     |
|                       | PL                         | Prelimbic area                            |
|                       | ILA                        | Infralimbic area                          |
|                       | ORBl                       | Orbital area, lateral part                |
|                       | ORBm                       | Orbital area, medial part                 |
|                       | ORBvl                      | Orbital area, ventrolateral part          |
|                       | AId                        | Agranular insular area, dorsal part       |
|                       | AIV                        | Agranular insular area, ventral part      |
|                       | AIp                        | Agranular insular area, posterior part    |
|                       | GU                         | Gustatory areas                           |
|                       | VISC                       | Visceral area                             |
|                       | SSs                        | Supplemental somatosensory area           |
|                       | SSp                        | Primary somatosensory area                |
|                       | MOp                        | Primary motor area                        |
|                       | VIS                        | Visual areas                              |
|                       | RSP                        | Retrosplenial area                        |
|                       | AUD                        | Auditory areas                            |
| TEa                   | Temporal association areas |                                           |
| ECT                   | Ectorhinal area            |                                           |
| Olfactory areas       | OLF                        | Olfactory areas                           |
| Hippocampal formation | ENT                        | Entorhinal area                           |
| Cortical subplate     | CLA                        | Clastrum                                  |
|                       | EP                         | Endopiriform nucleus                      |
|                       | BLA                        | Basolateral amygdalar nucleus             |
| Cerebral nuclei       | STR                        | Striatum                                  |
|                       | PAL                        | Pallidum                                  |
| Thalamus              | RT                         | Reticular nucleus of the thalamus         |
|                       | AM                         | Anteromedial nucleus                      |
|                       | IAD                        | Interanterodorsal nucleus of the thalamus |
|                       | IAM                        | Interanteromedial nucleus of the thalamus |
|                       | CL                         | Central lateral nucleus of the thalamus   |
|                       | LD                         | Lateral dorsal nucleus of thalamus        |
|                       | LP                         | Lateral posterior nucleus of the thalamus |
|                       | AD                         | Anterodorsal nucleus                      |
| RE                    | Nucleus of reuniens        |                                           |

|              |       |                                                                    |
|--------------|-------|--------------------------------------------------------------------|
|              | PR    | Perireunensis nucleus                                              |
|              | PT    | Parataenial nucleus                                                |
|              | PVT   | Paraventricular nucleus of the thalamus                            |
|              | LH    | Lateral habenula                                                   |
|              | MH    | Medial habenula                                                    |
|              | VM    | Ventral medial nucleus of the thalamus                             |
|              | PCN   | Paracentral nucleus                                                |
|              | VAL   | Ventral anterior-lateral complex of the thalamus                   |
|              | SMT   | Submedial nucleus of the thalamus                                  |
|              | RH    | Rhomboid nucleus                                                   |
|              | MD    | Mediodorsal nucleus of thalamus                                    |
|              | IMD   | Intermediodorsal nucleus of the thalamus                           |
|              | CM    | Central medial nucleus of the thalamus                             |
|              | PF    | Parafascicular nucleus                                             |
|              | VPMpc | Ventral posteromedial nucleus of the thalamus, parvicellular part  |
|              | VPLpc | Ventral posterolateral nucleus of the thalamus, parvicellular part |
|              | VPL   | Ventral posterolateral nucleus of the thalamus                     |
|              | PO    | Posterior complex of the thalamus                                  |
|              | VPM   | Ventral posteromedial nucleus of the thalamus                      |
| Hypothalamus | HY    | Hypothalamus                                                       |
| Midbrain     | MRN   | Midbrain reticular nucleus                                         |
|              | PAG   | Periaqueductal gray                                                |
|              | SCm   | Superior colliculus, motor related                                 |
| Hindbrain    | P     | Pons                                                               |
|              | MY    | Medulla                                                            |
