# Supplementary material for: Topographic organization of single-neuron projectome for mouse prefrontal cortex
Source: Research Square preprint supplement (doi:10.21203/rs.3.rs-117637/v1), 2020-12-18

Extended Data Figure 10

**a** Hierarchical clustering of terminal arbors in striatum based on coverage factor (Arbor number = 7970)

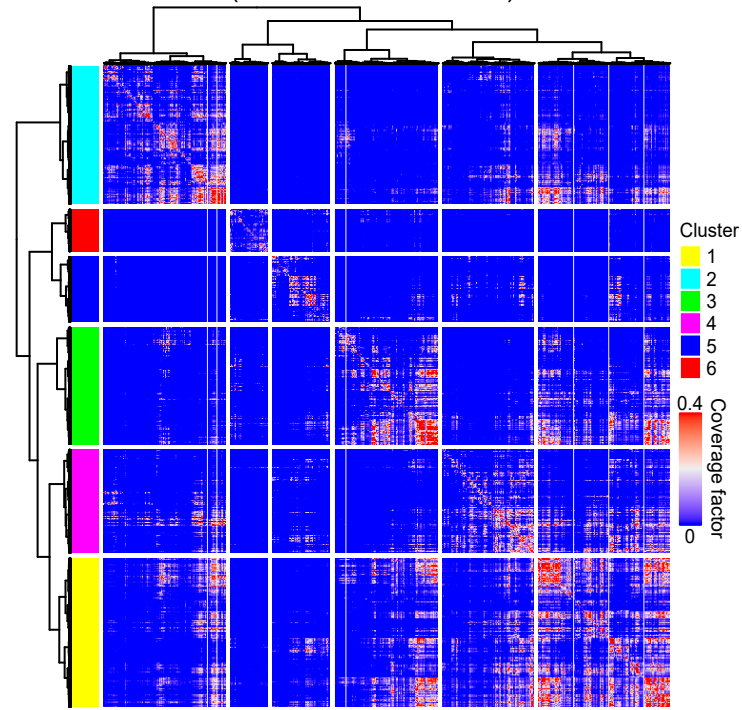

**b** Spatial distribution of arbor clusters in striatum

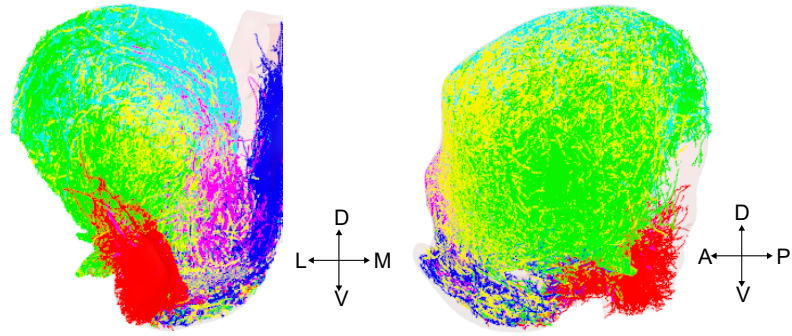

**c**

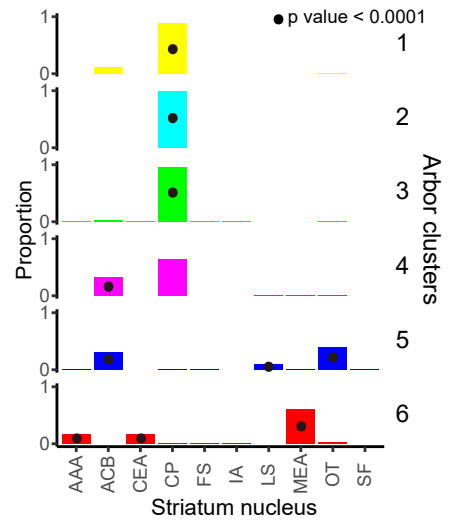

**d**

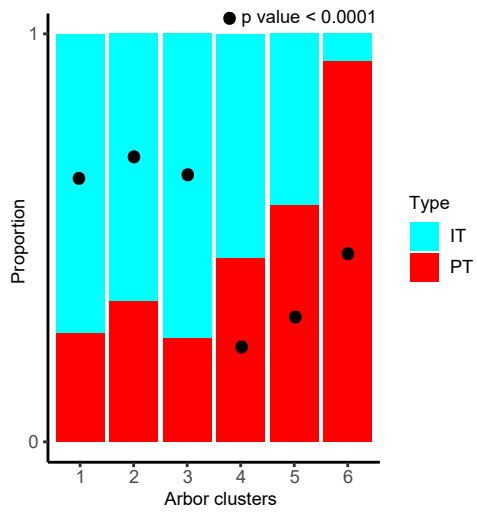

**e**

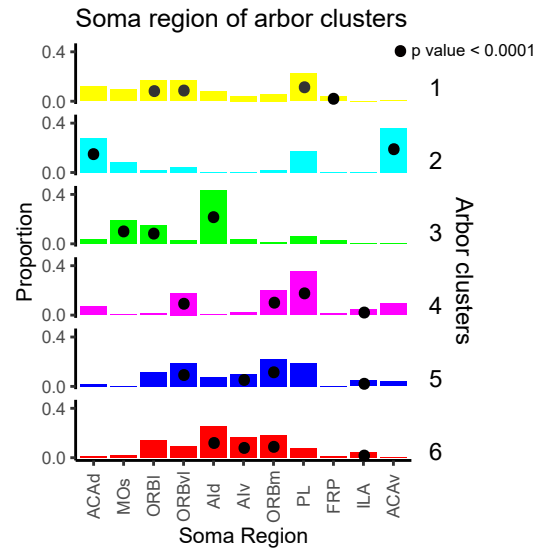

Supplement: Supplementary file 8 [file 9144a4534fd4a48d92a4f6fb.pdf]
