# Supplementary material for: Topographic organization of single-neuron projectome for mouse prefrontal cortex
Source: Research Square preprint supplement (doi:10.21203/rs.3.rs-117637/v1), 2020-12-18

Extended Data Figure 2

**a** Scoring criteria of neurite tracing

| Penalty | Condition                                                  |
|---------|------------------------------------------------------------|
| -1      | # of false negative or false positive of branches = 1      |
| -6      | # of false negative or false positive of branches = 2 or 3 |
| -11     | # of false negative or false positive of branches > 3      |
| -6      | Loop forming                                               |
| -11     | Mis-connections to other neurons                           |

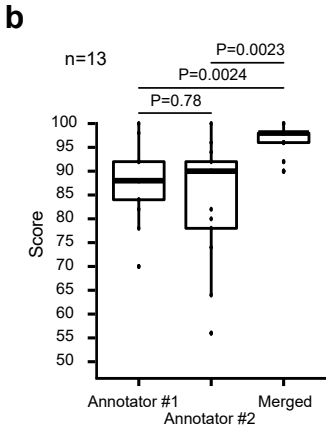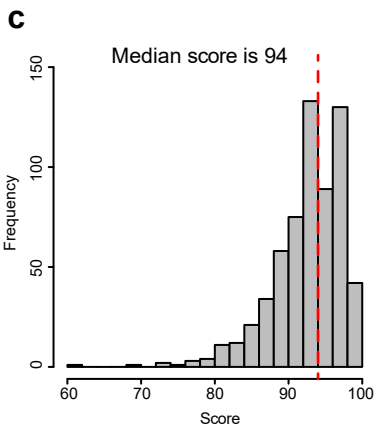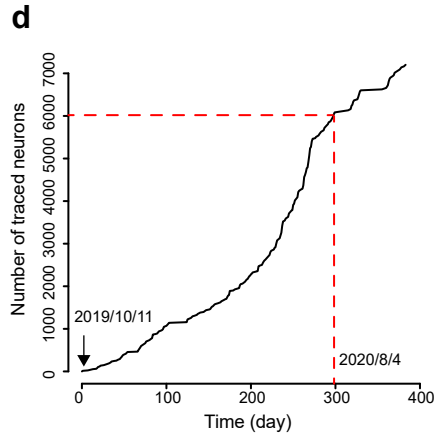

**e** Step 1: affine registration

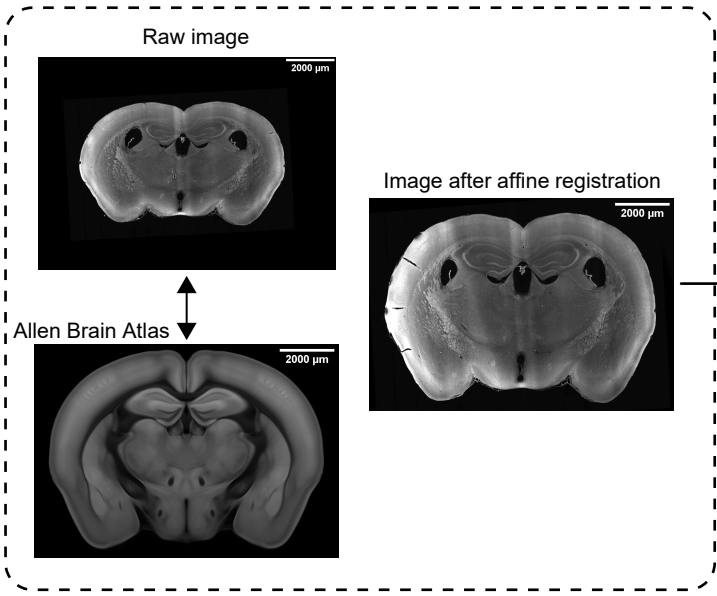

Step 2: nonrigid registration based on segmentation

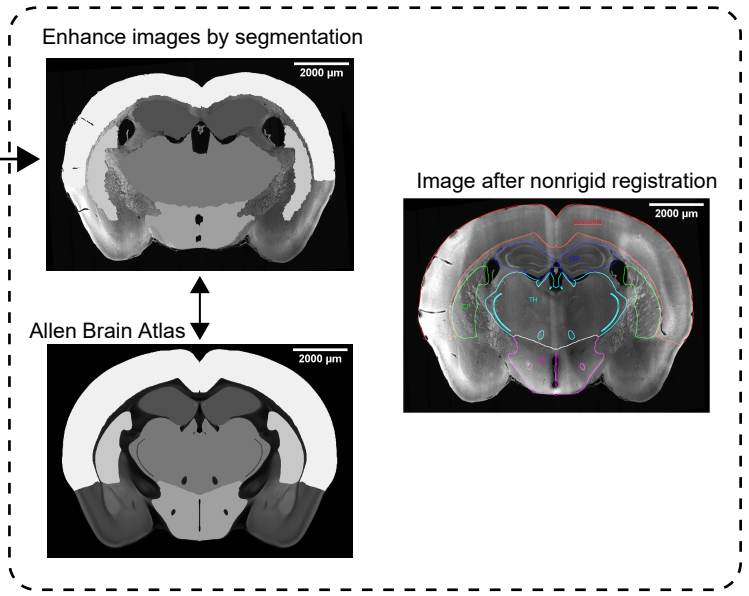

**f** Validation of image registration

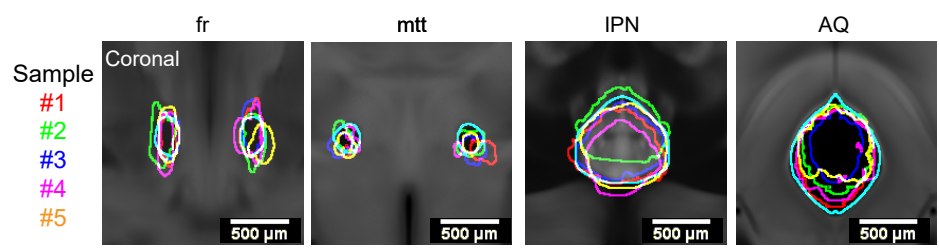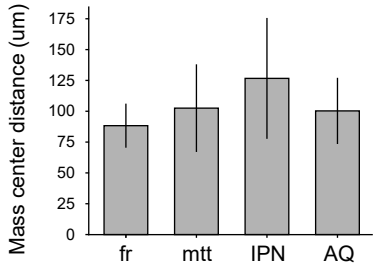

Supplement: Supplementary file 11 [file bcf9c8a5acbcaf2fb289005c.pdf]
