# Supplementary figures and images for: Topographic organization of single-neuron projectome for mouse prefrontal cortex
Source: Research Square preprint supplement (doi:10.21203/rs.3.rs-117637/v1), 2020-12-18

Extended Data Figure 7

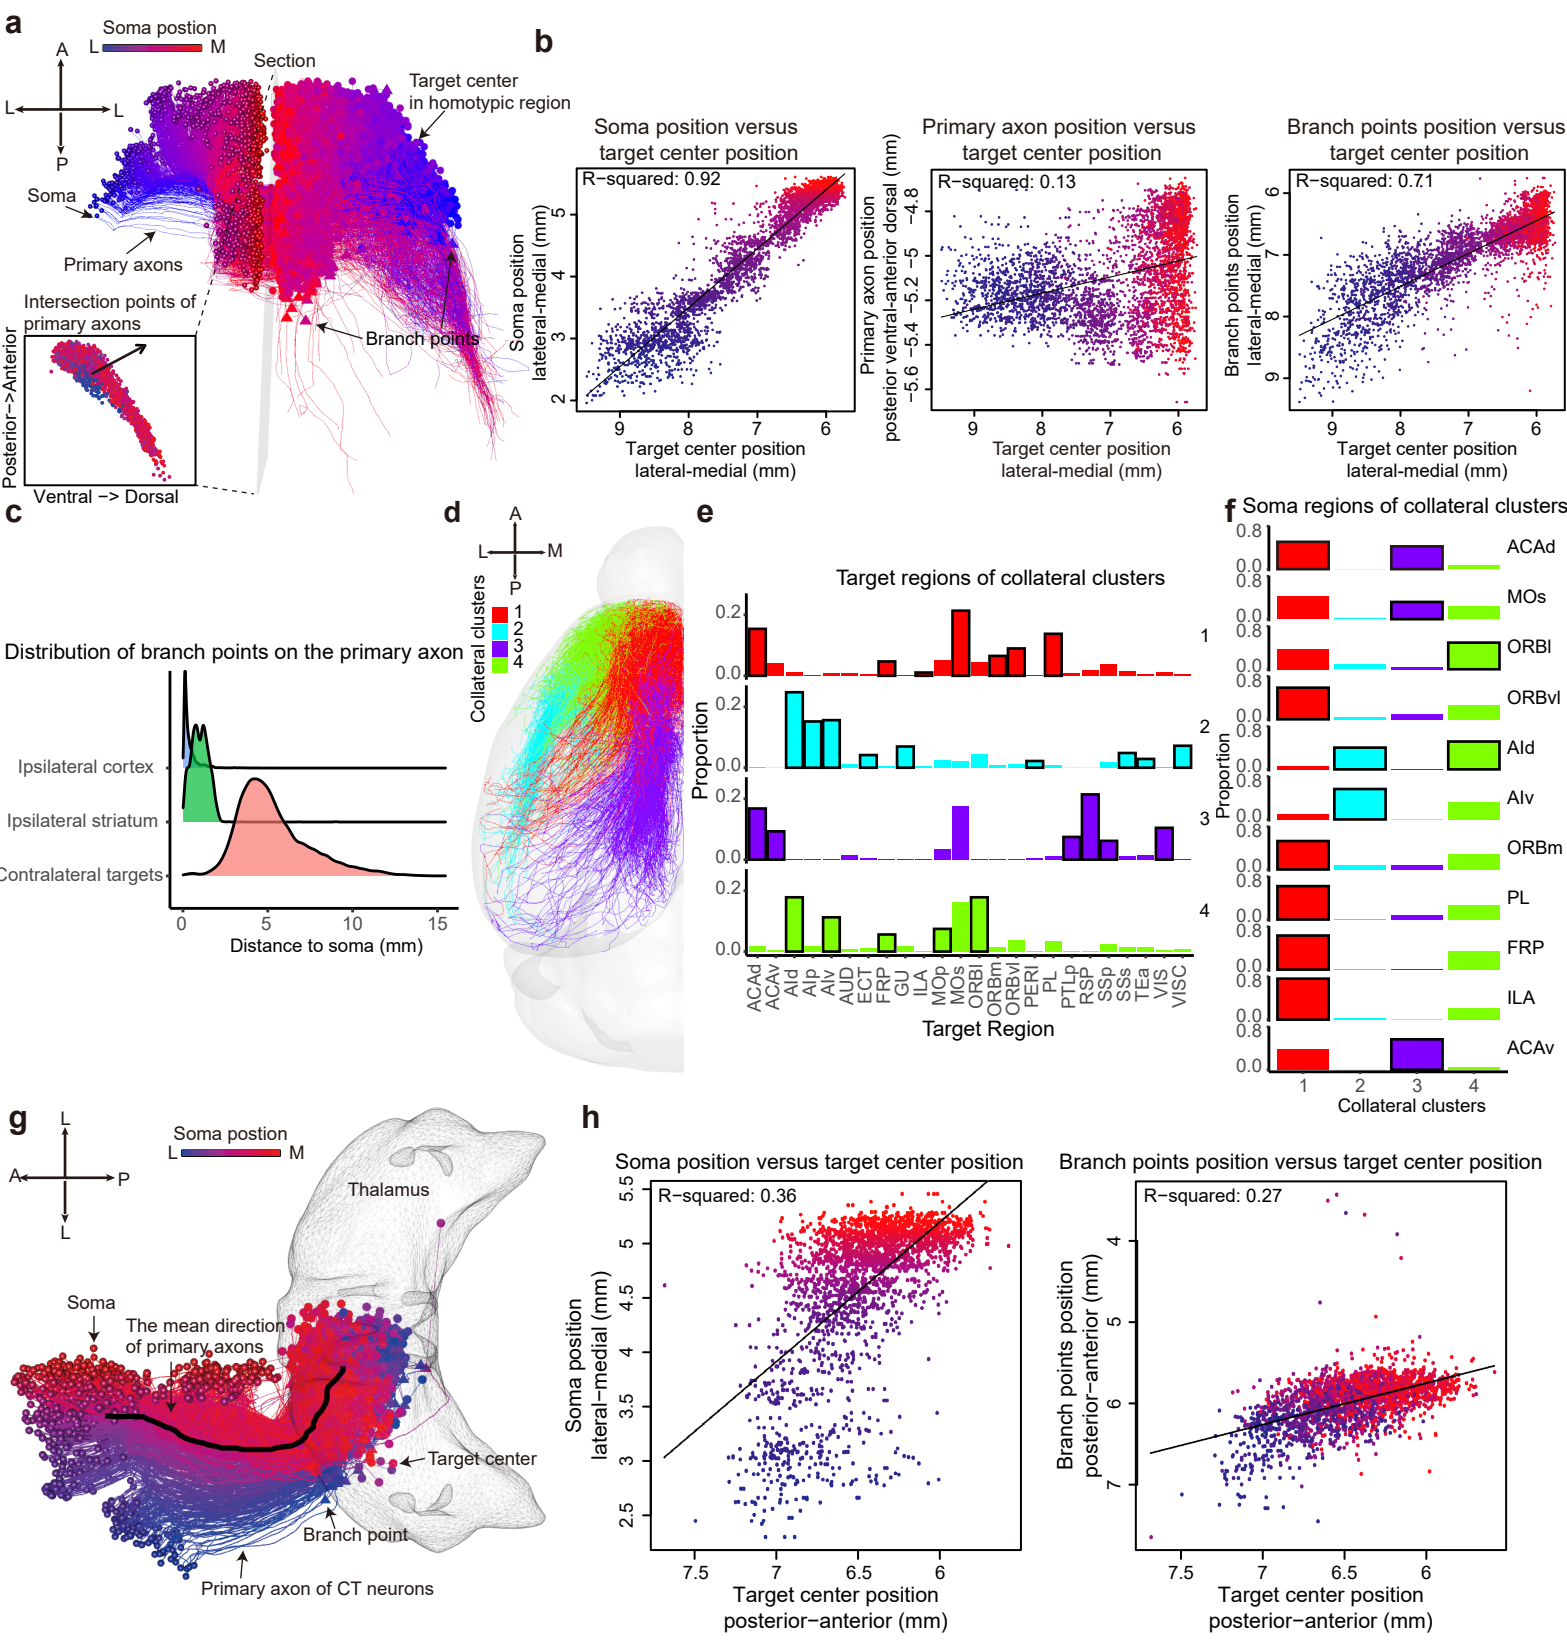

Supplement: Supplementary file 1 [file 00aa814a7247f06ef21ca418.pdf]

# Extended Data Figure 8

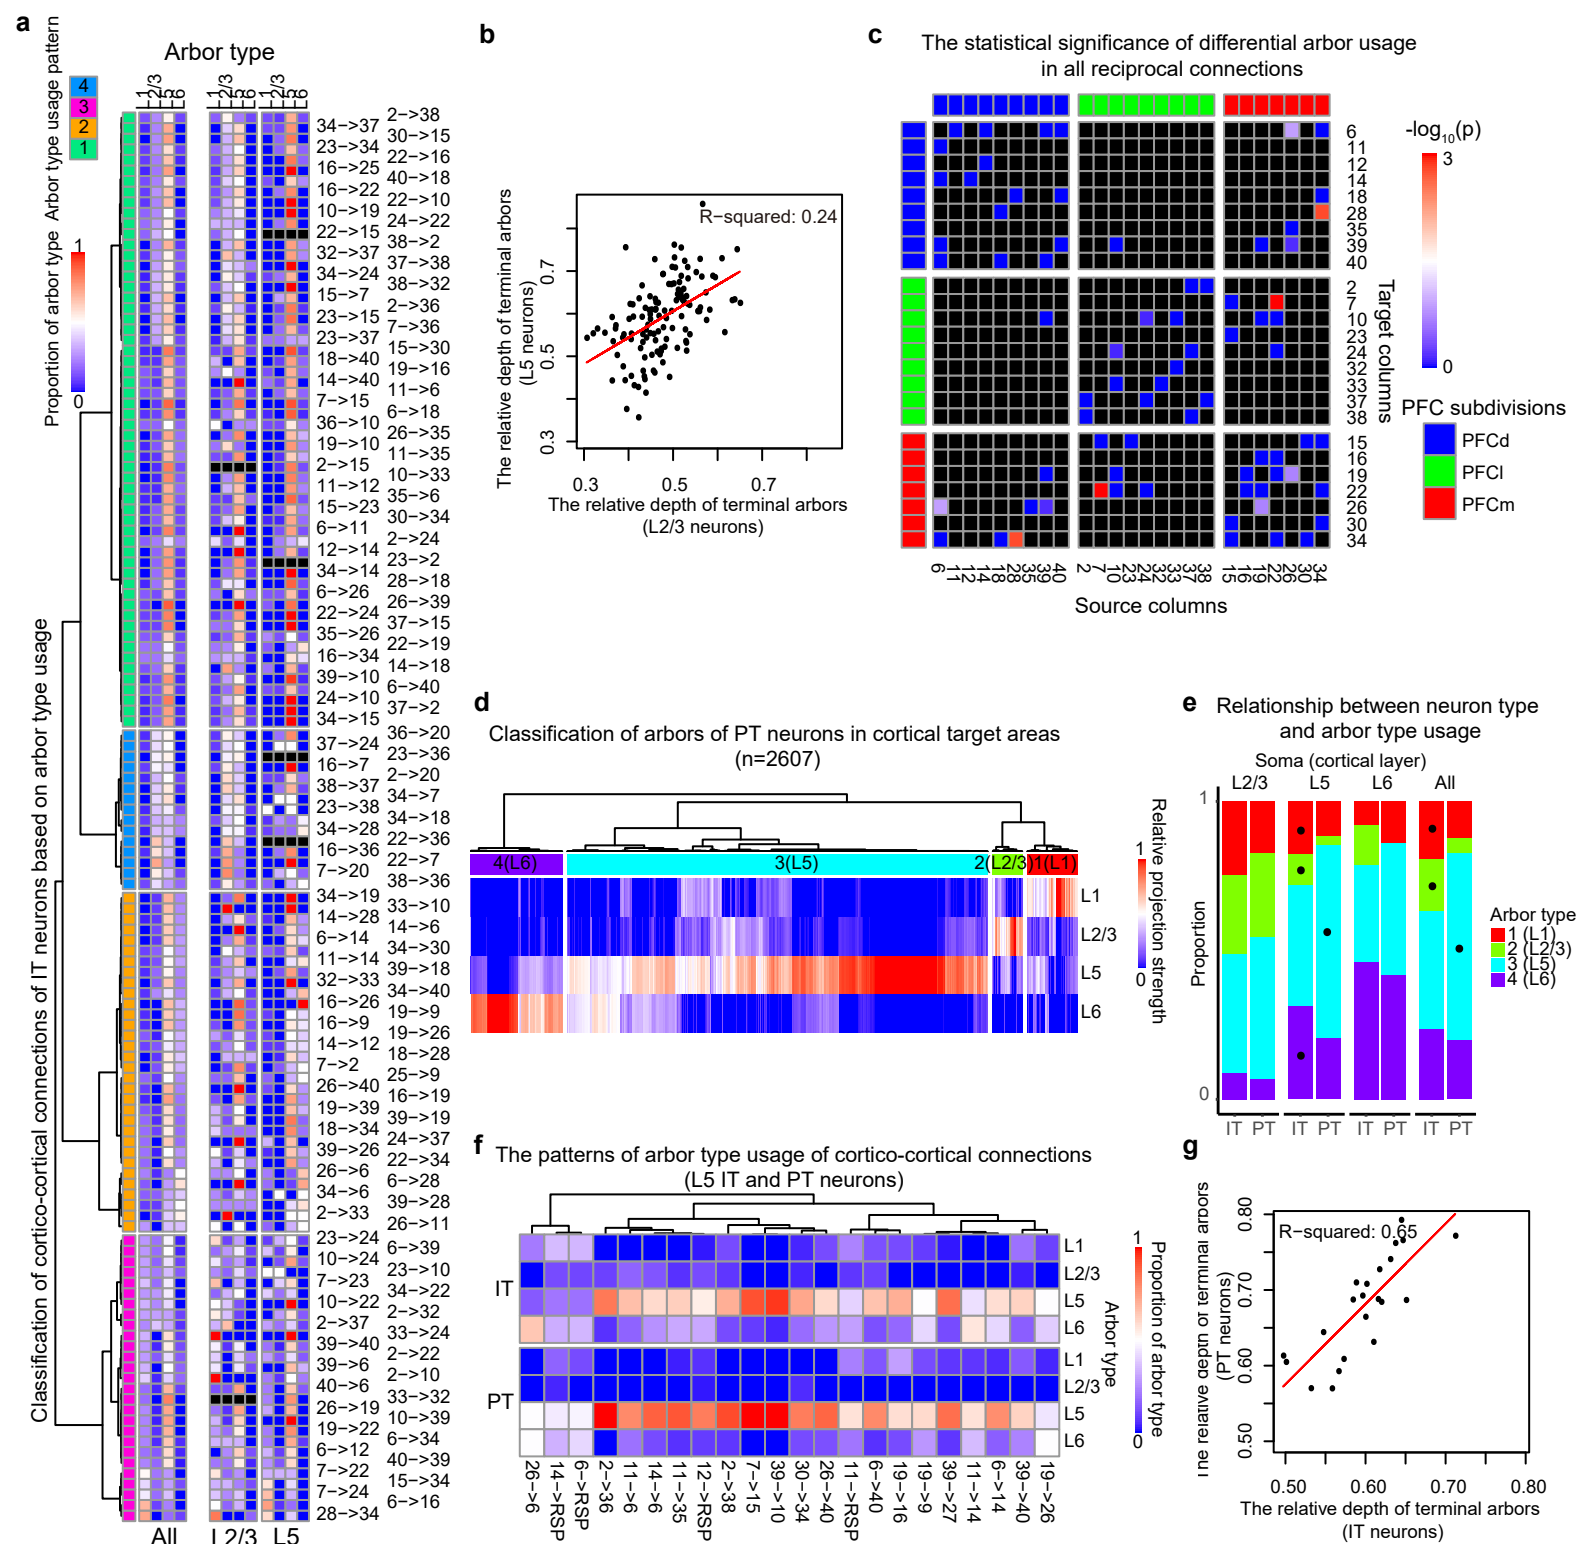

Supplement: Supplementary file 2 [file 1fa7a8a8ebfaf4e9385c1594.pdf]

# Extended Data Figure 4

## a Classification of PT neurons (n=1,564) based on single-neuron projection

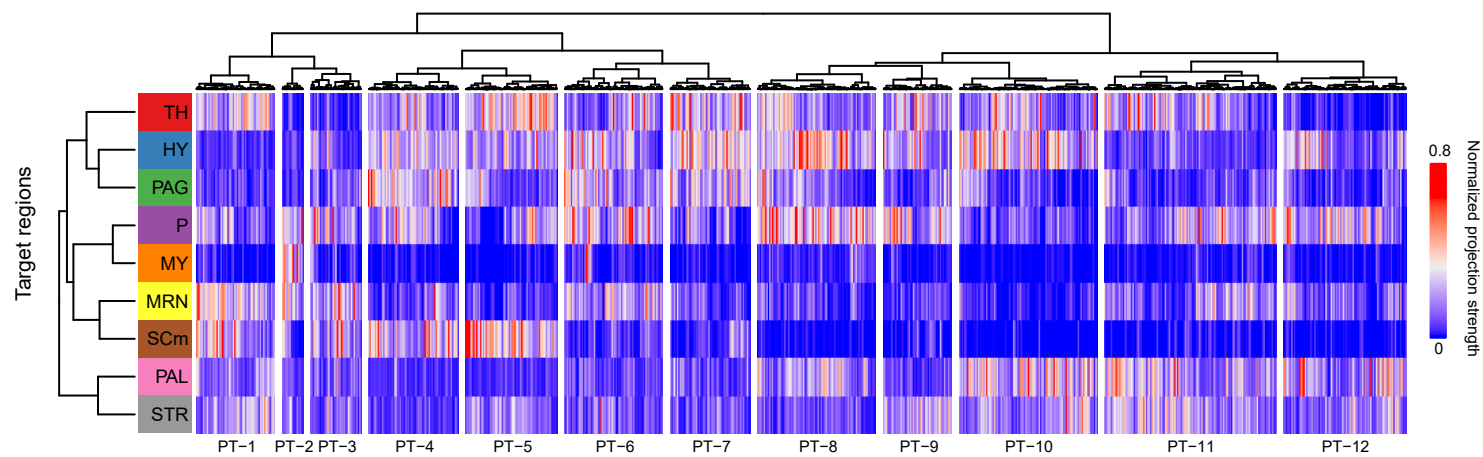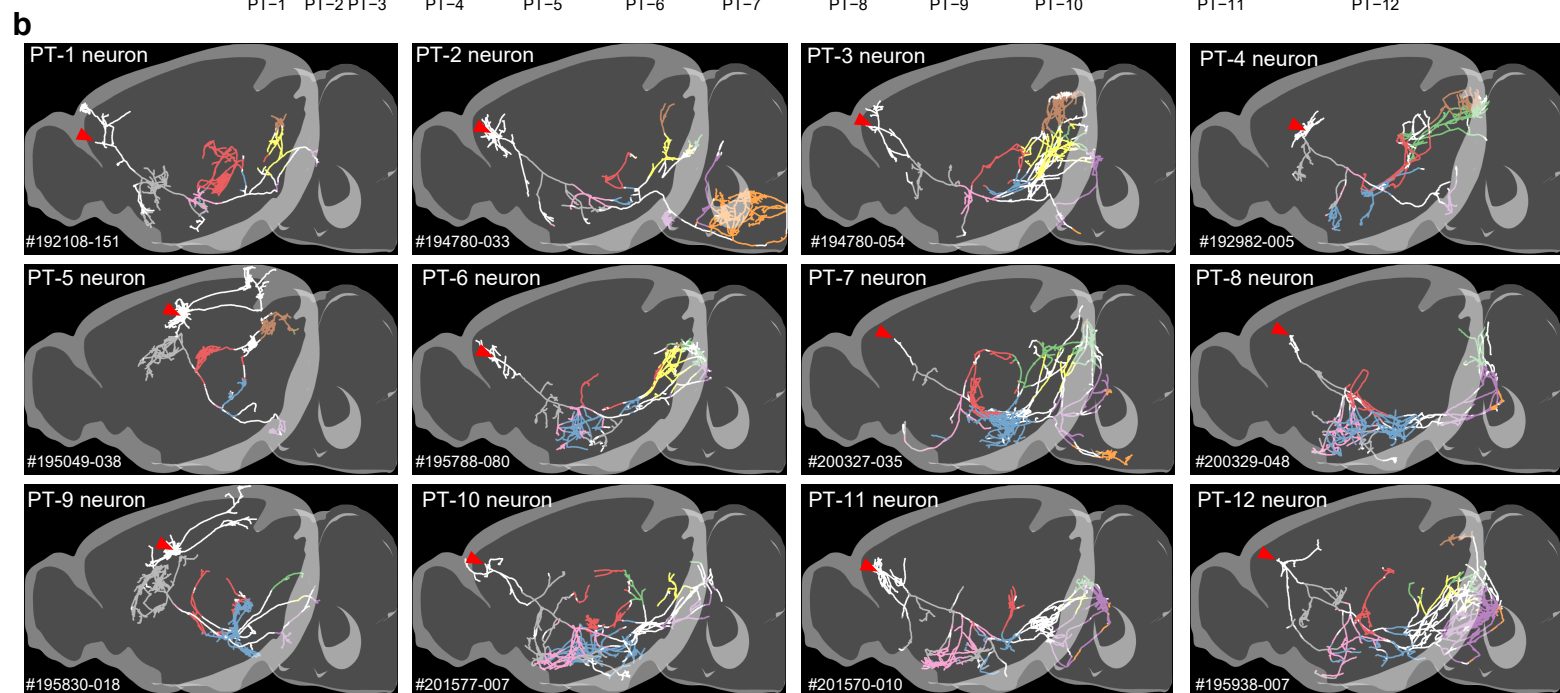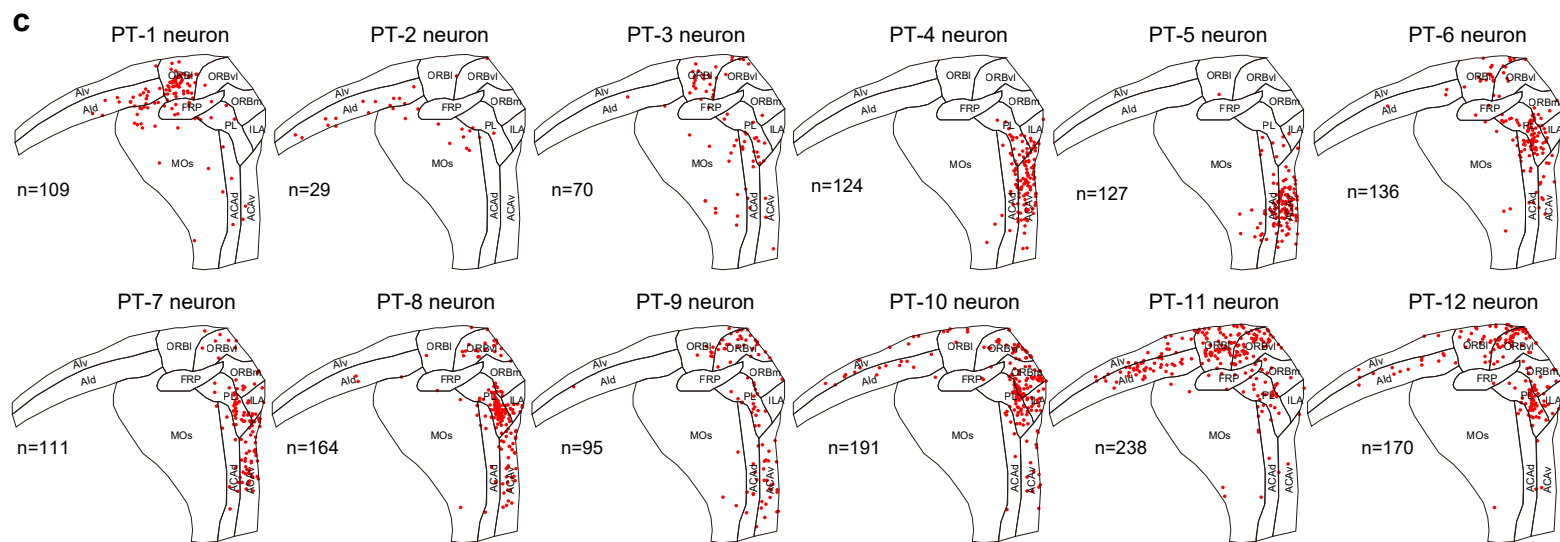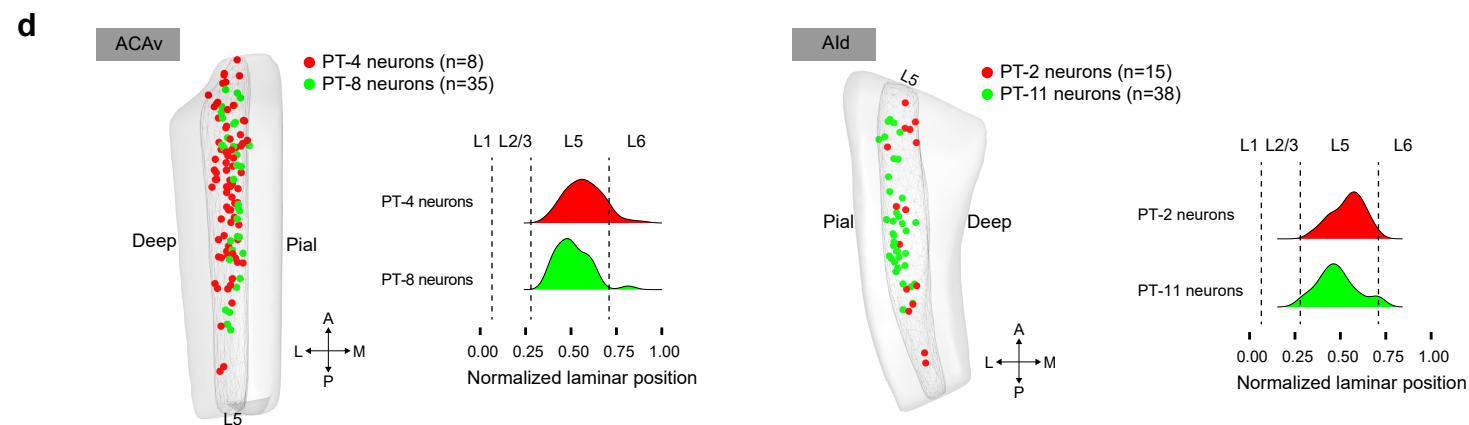

Supplement: Supplementary file 6 [file 86d7fbbaf0a91c1f48d10d0f.pdf]

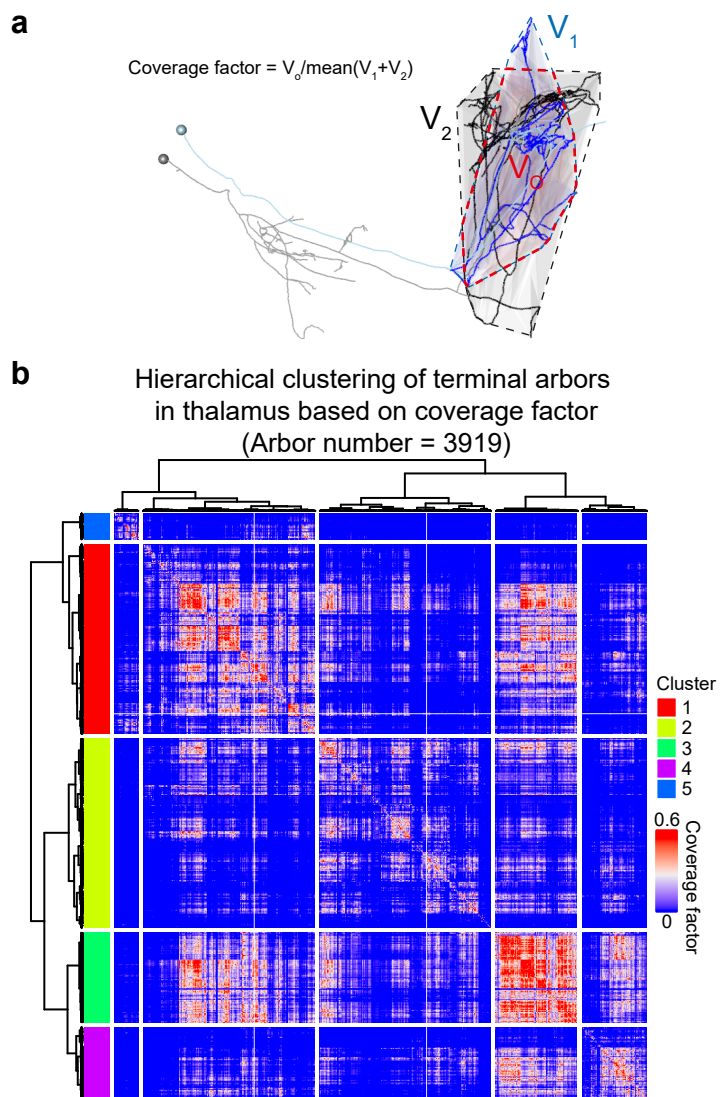

**c** Spatial distribution of arbor clusters in thalamus

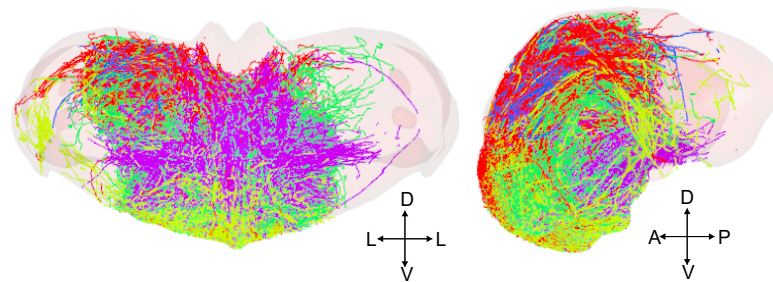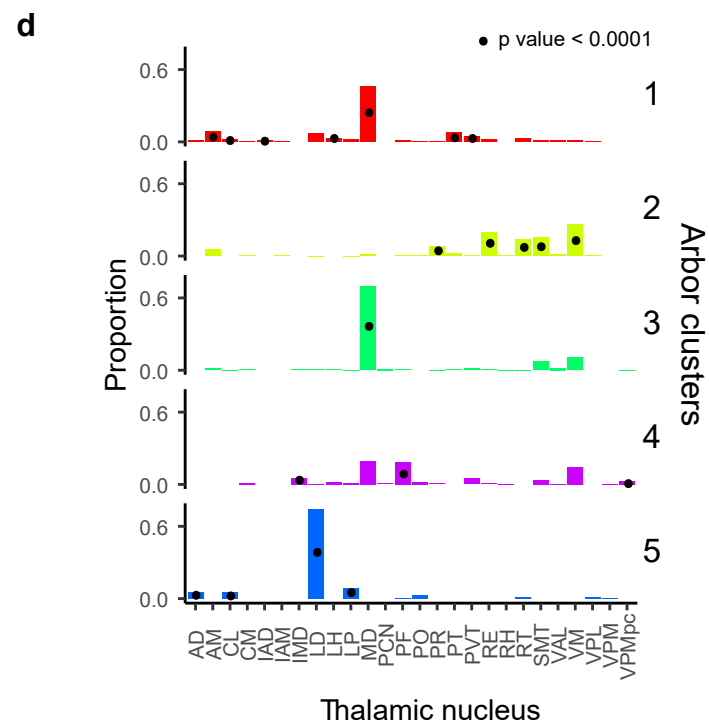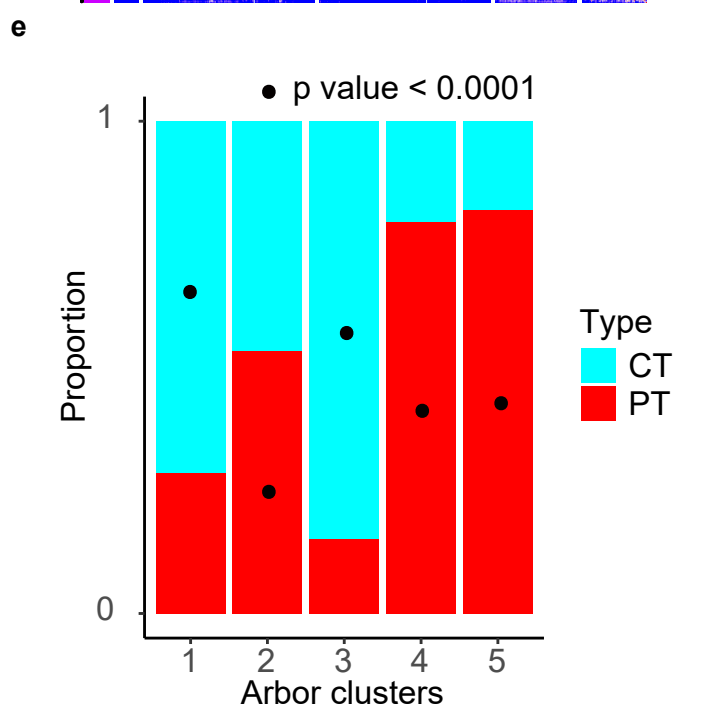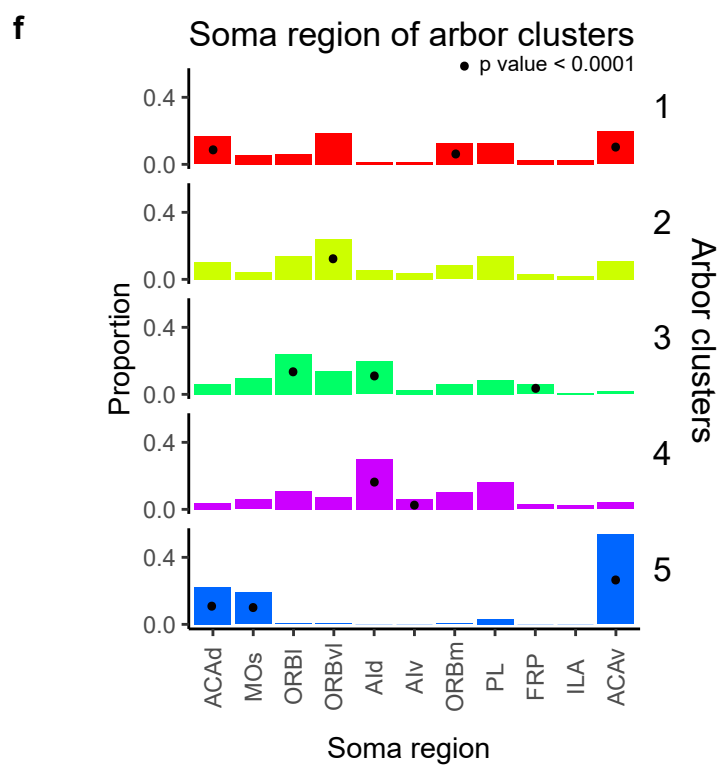

Supplement: Supplementary file 9 [file a28502677ae1e0e54d87242d.pdf]

**a**

Classification of CT neurons (n=1,005) based on single-neuron projectome

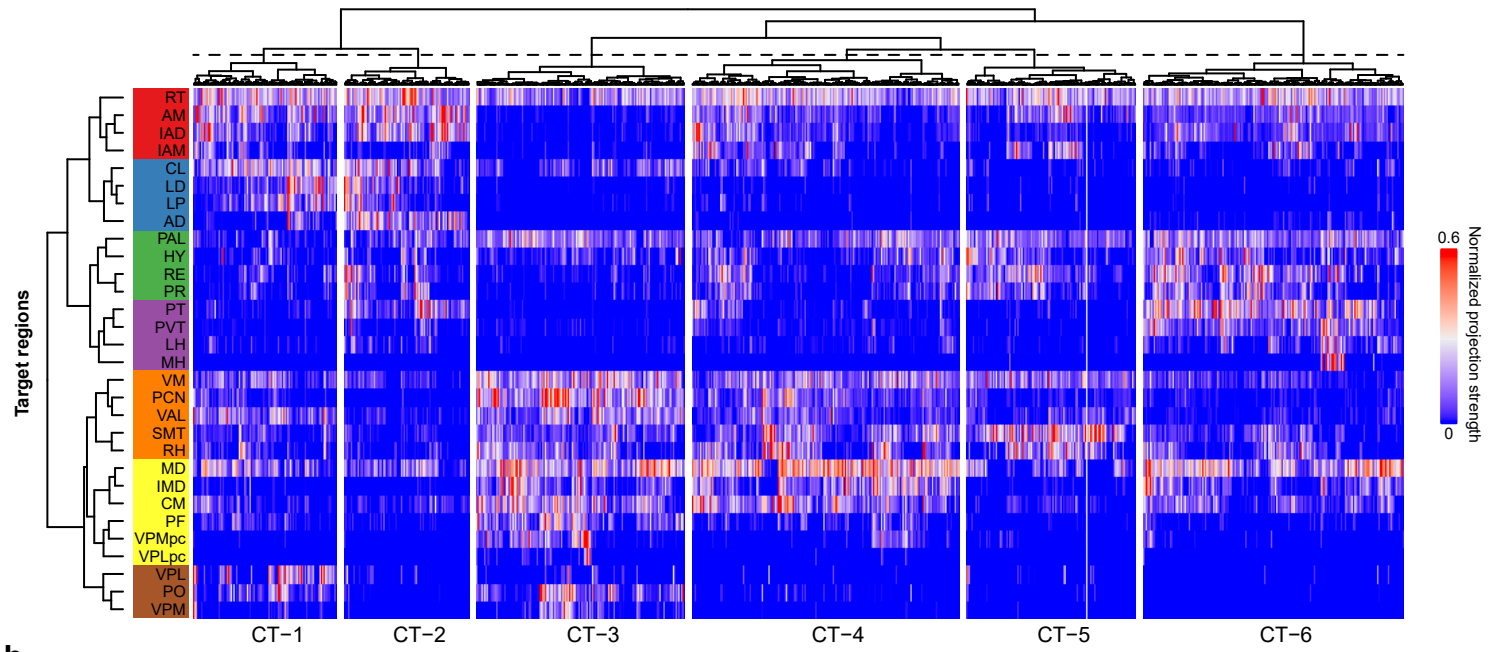

**b**

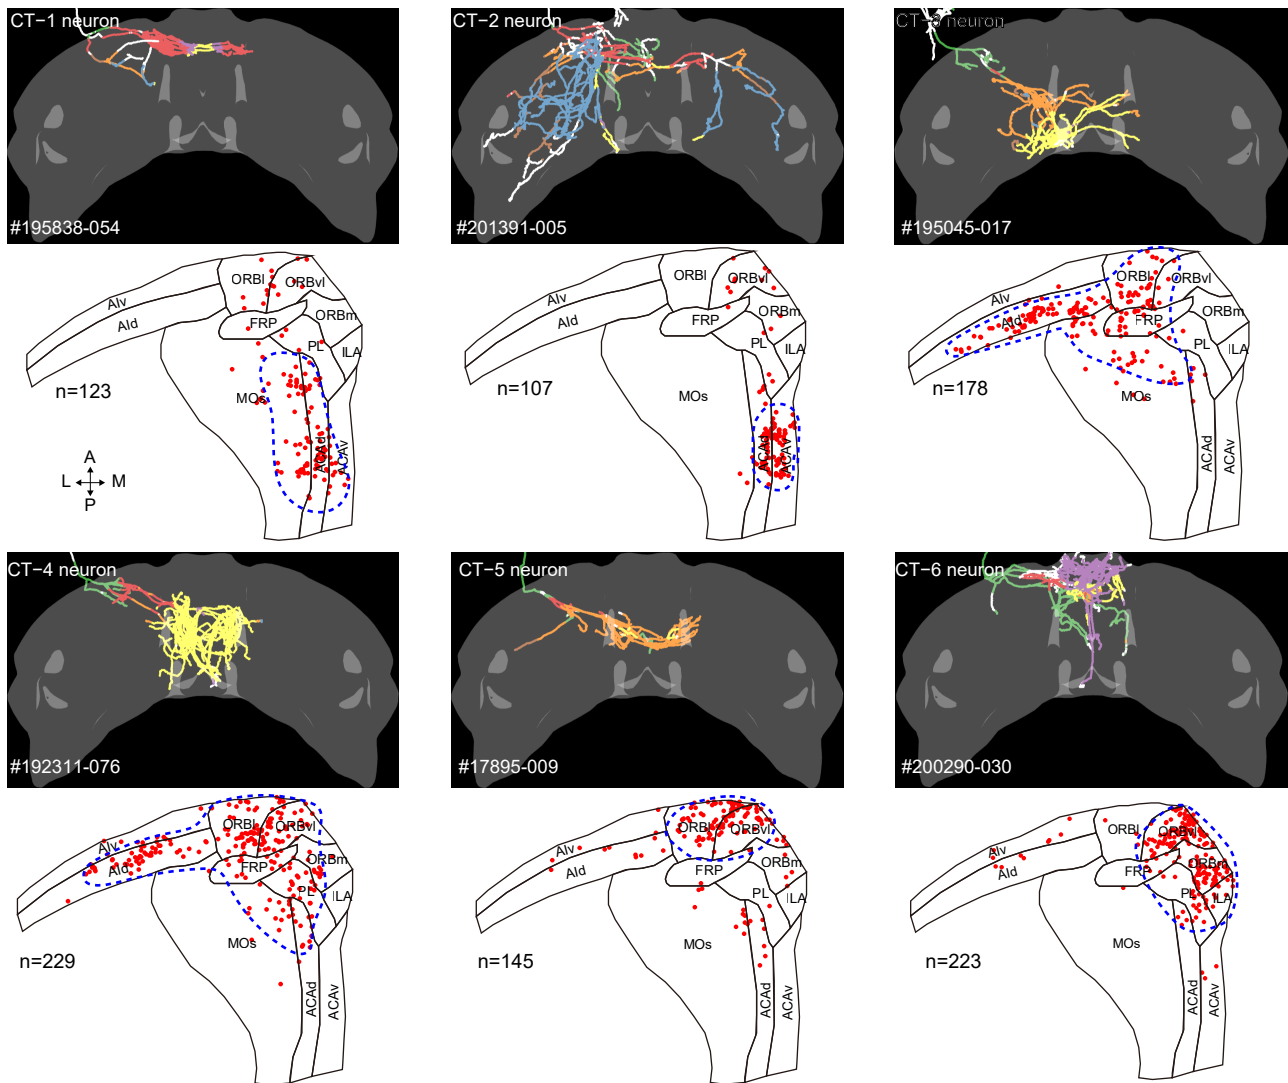

**c**

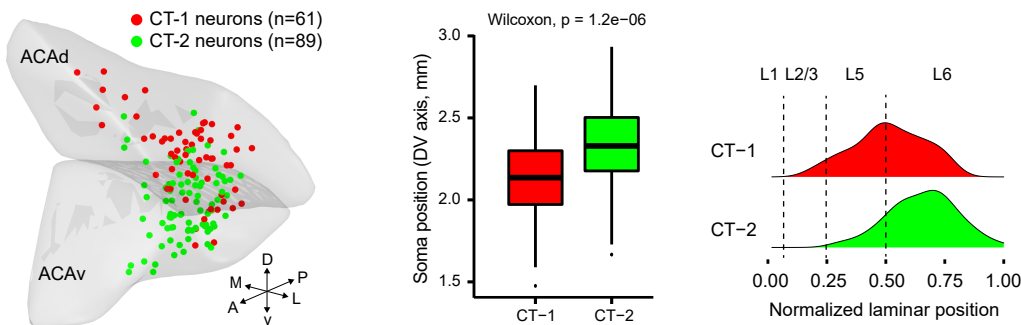

Supplement: Supplementary file 10 [file b9c5a56d404442c1f03cbcb4.pdf]

# Extended Data Figure 6

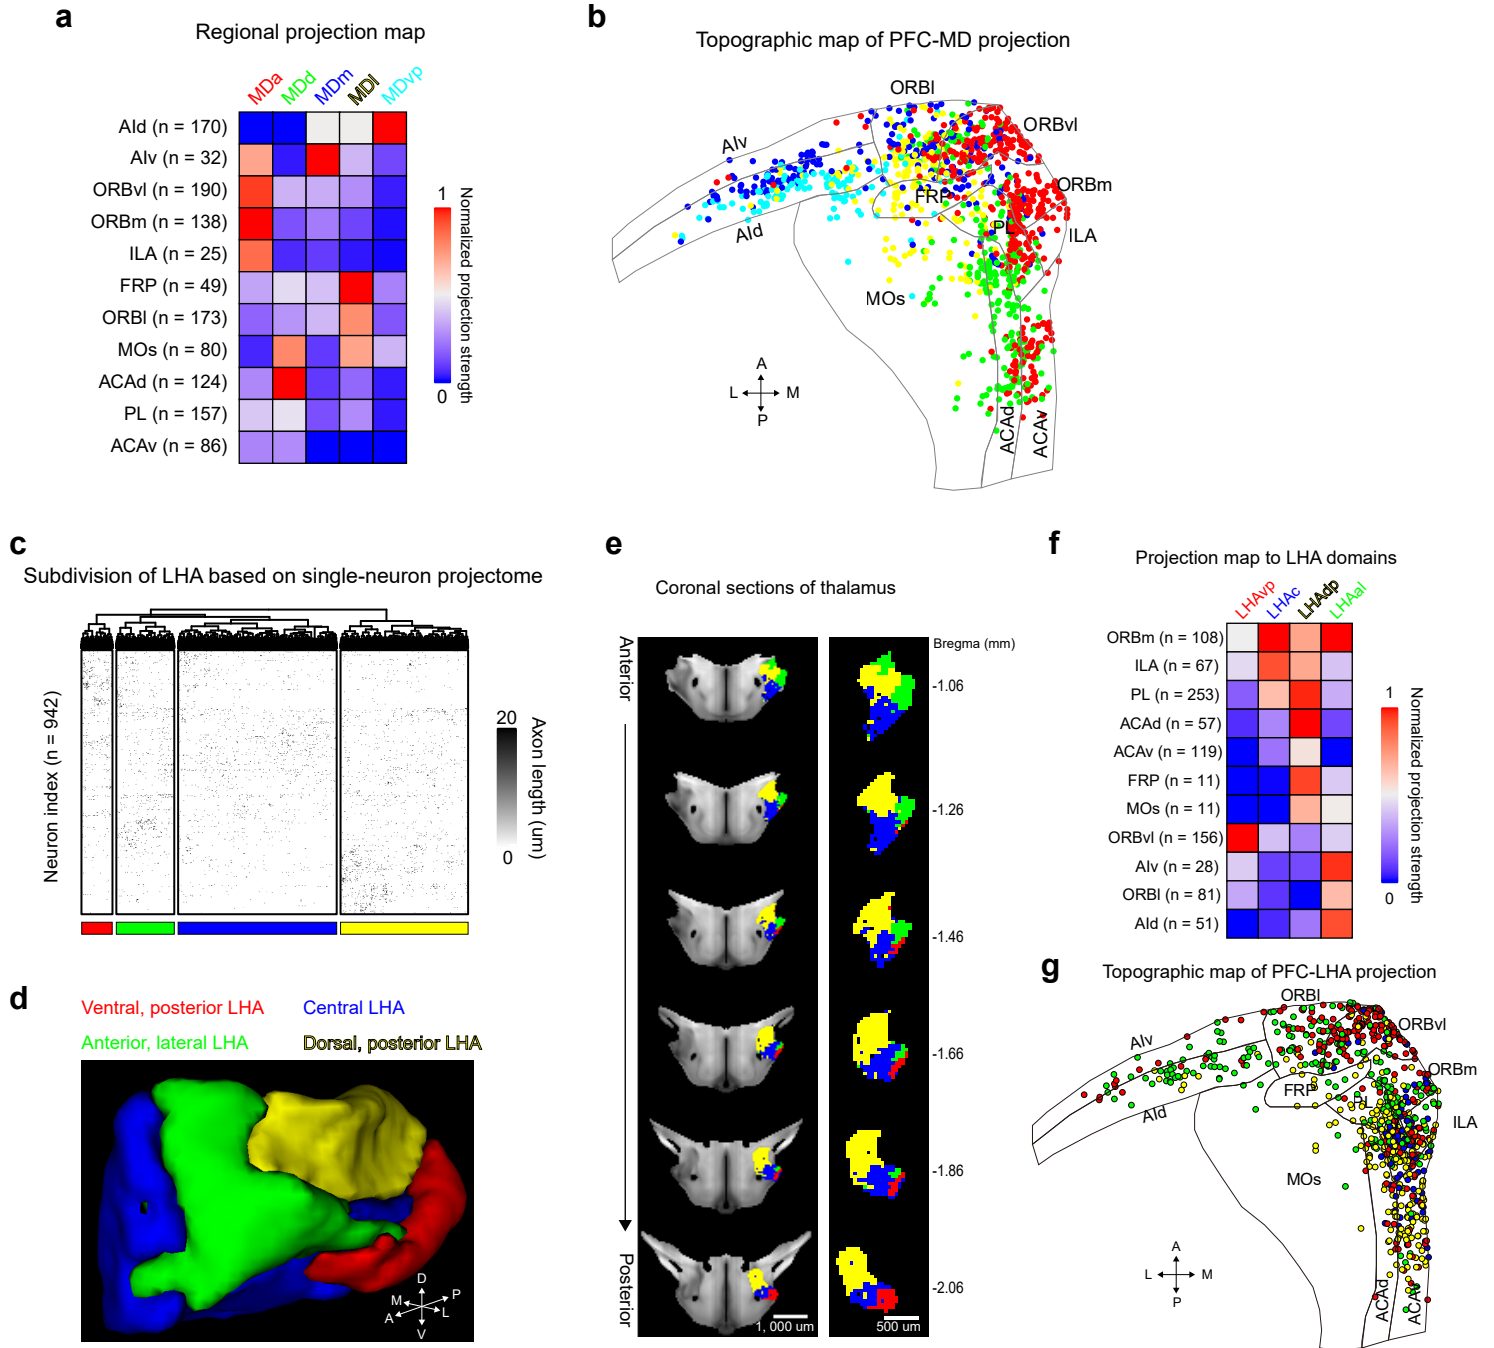

Supplement: Supplementary file 14 [file e3da75b9cc7fc1597abba0f9.pdf]

# Extended Data Figure 1

**a**

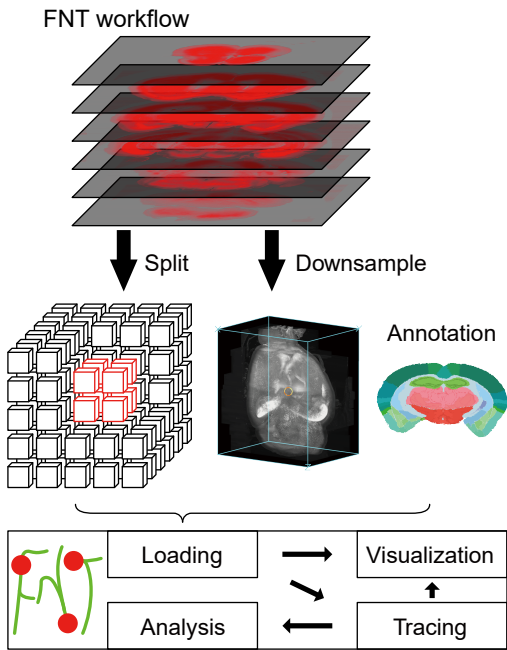

**b**

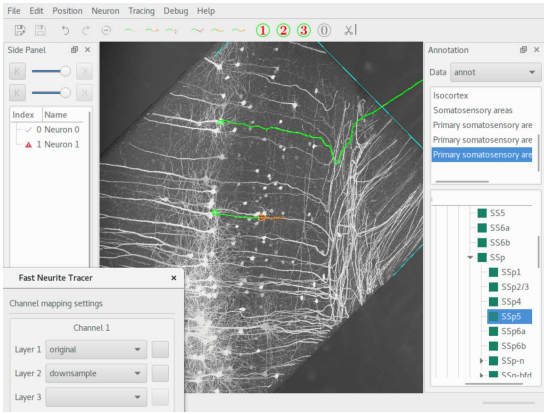

**c**

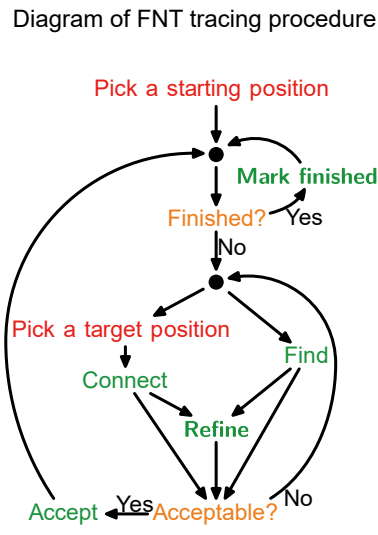

**d**

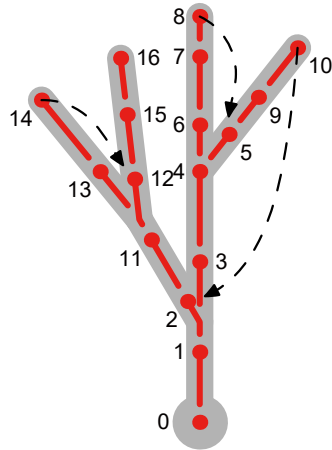

**e**

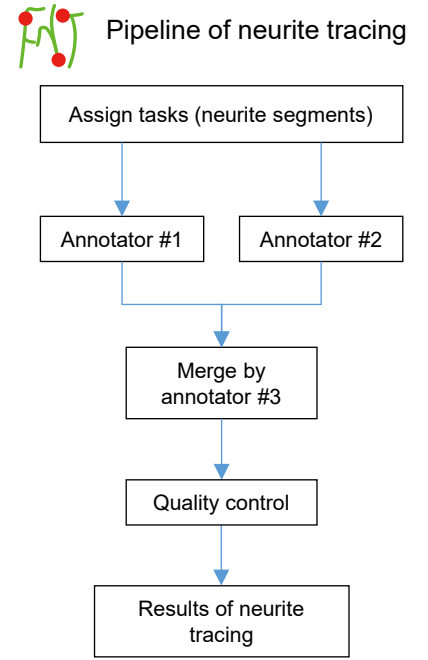

Supplement: Supplementary file 15 [file fdf7259cca68c5879a972da8.pdf]
